# Supplementary material for: High entropy alloy nanoparticles encapsulated in graphitised hollow carbon tubes for oxygen reduction electrocatalysis
Source: Royal Society of Chemistry journal article supplement (doi:10.1039/d2dt03637a), 2023-01-01
Supplement: d2dt03637a1.pdf [file d2dt03637a1.pdf]

## **High Entropy Alloy Nanoparticles Encapsulated in Graphitised Hollow Carbon Tubes for Oxygen Reduction Electrocatalysis**

Yuechao Yao<sup>a</sup>, Zhangjian Li<sup>b</sup>, Yibo Dou<sup>c</sup>, Tao Jiang<sup>a</sup>, Jizhao Zou<sup>b</sup>, Sung Yul Lim<sup>d</sup>, Poul Norby<sup>e</sup>, Eugen Stamate<sup>f</sup>, Jens Oluf Jensen<sup>e</sup>, Wenjing Zhang<sup>a,\*</sup>

*<sup>a</sup>Department of Environmental and Resource Engineering, Technical University of Denmark, Miljøvej 113, Kgs. Lyngby, 2800, Denmark*

*<sup>b</sup>Shenzhen Key Laboratory of Special Functional Materials & Shenzhen Engineering Laboratory for Advance Technology of Ceramics, College of Materials Science and Engineering, Shenzhen University, Shenzhen, Guangdong, 518060, PR China*

*<sup>c</sup>State Key Laboratory of Chemical Resource Engineering, Beijing University of Chemical Technology, Beijing, China*

*<sup>d</sup>Department of Chemistry and Research Institute for Basic Science, Kyung Hee University, Seoul, 02447, Republic of Korea*

*<sup>e</sup>Department of Energy Conversion and Storage, Technical University of Denmark, Fysikvej 310, 2800 Kgs. Lyngby, Denmark*

*<sup>f</sup>National Centre for Nano Fabrication and Characterization, Technical University of Denmark, 2800 Kgs. Lyngby, Denmark*

*E-mail addresses: wenz@env.dtu.dk (W. Zhang)*

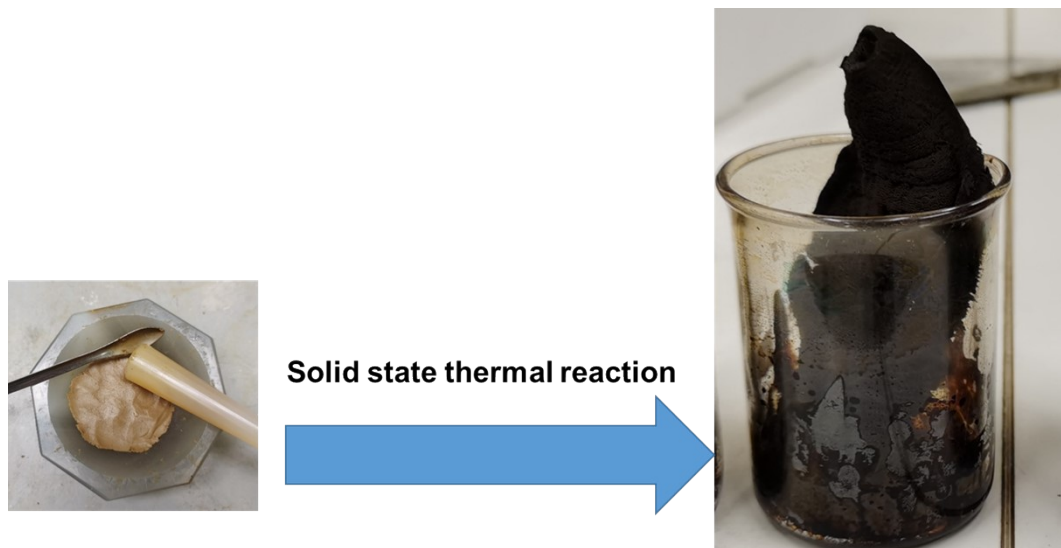

**Figure S1.** The digital picture of mixed precursor before the solid-state thermal reaction and later.

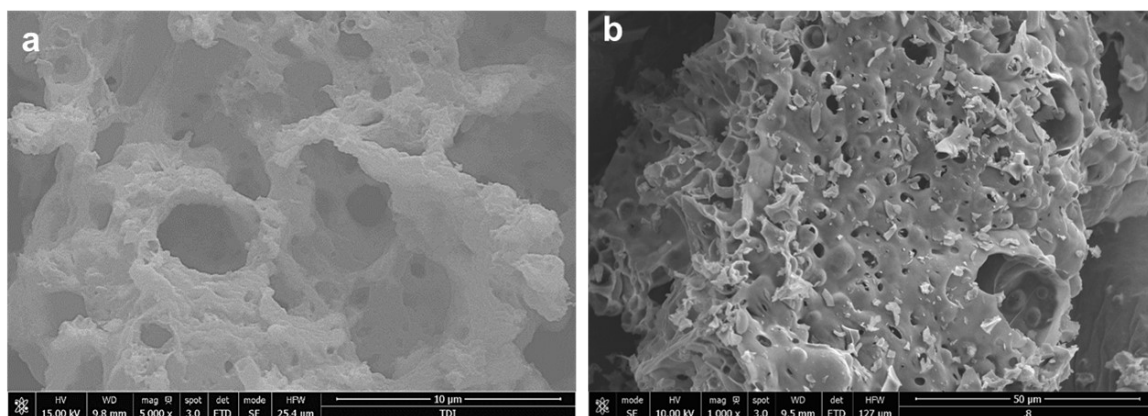

**Figure S2.** (a) The SEM images of precursor FeCoNiMnCu(1:2) and (b) FeCoNiMnCu-1000(2:1).

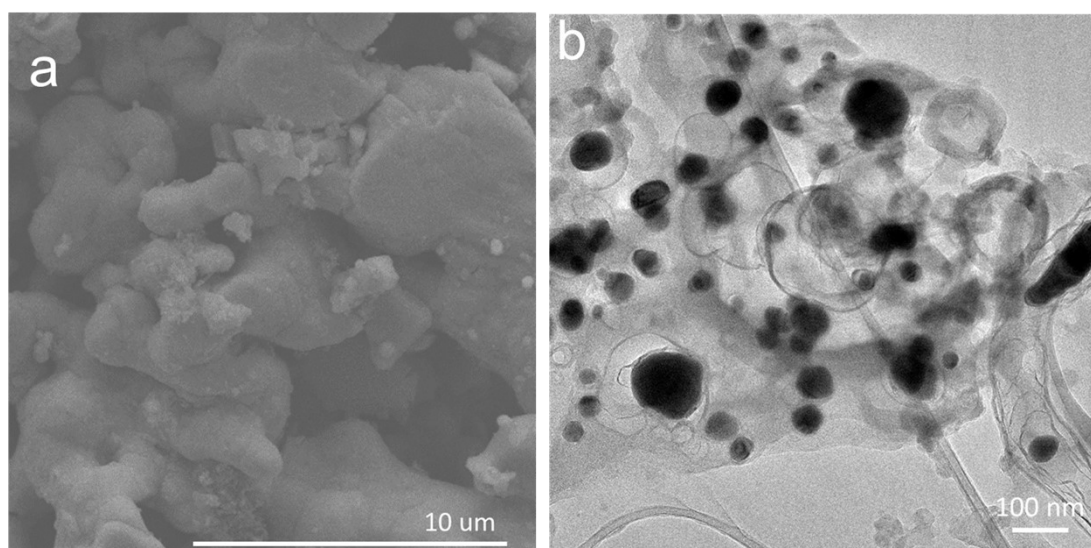

**Figure S3.** (a) The SEM images of FeCoNiMnCu-900(1:2) and (b) TEM image of FeCoNiMnCu-1000(1:1).

**Table S1** The elements mapping data of FeCoNiMnCu-900(1:2).

| Elements | Wt%  |
|----------|------|
| Co       | 19.2 |
| Fe       | 18.1 |
| Ni       | 16.1 |
| Mn       | 11.5 |
| Cu       | 11.9 |
| C        | 7.6  |

**Table S2** The proportion of each metal in alloys by ICP-MS analysis.

| Samples              | Mn Content(% in the mass of FeCoNiMnCu) | Fe Content(% in the mass of FeCoNiMnCu) | Co Content(% in the mass of FeCoNiMnCu) | Ni Content(% in the mass of FeCoNiMnCu) | Cu Content(% in the mass of FeCoNiMnCu) | Zn Content in FeCoNiMnCuZn system |
|----------------------|-----------------------------------------|-----------------------------------------|-----------------------------------------|-----------------------------------------|-----------------------------------------|-----------------------------------|
| FeCoNiMnCu-900(1:1)  | 4.7                                     | 24                                      | 23                                      | 23                                      | 26                                      | 2.3                               |
| FeCoNiMnCu-1000(1:1) | 3.7                                     | 24                                      | 26                                      | 20                                      | 27                                      | 0.6                               |
| FeCoNiMnCu-1100(1:1) | 2.8                                     | 24                                      | 24                                      | 23                                      | 26                                      | 1.2                               |

**Table S3** The results of specific surface area and pore volume for prepared catalysts.

| Sample               | Specific surface area m <sup>2</sup> /g | Pore volume cm <sup>3</sup> /g | Micropore volume cm <sup>3</sup> /g |
|----------------------|-----------------------------------------|--------------------------------|-------------------------------------|
| FeCoNiMnCu-900(1:1)  | 276.25                                  | 0.30 cc/g                      | 0.054 cc/g                          |
| FeCoNiMnCu-1000(1:1) | 489.40                                  | 0.36 cc/g                      | 0.109cc/g                           |
| FeCoNiMnCu-1100(1:1) | 348.69                                  | 0.30 cc/g                      | 0.068 cc/g                          |
| FeCoNiMnCu-1000(2:1) | 505.55                                  | 0.30 cc/g                      | 0.199 cc/g                          |
| FeCoNiMnCu-900(1:2)  | 6.09                                    | No                             | No                                  |

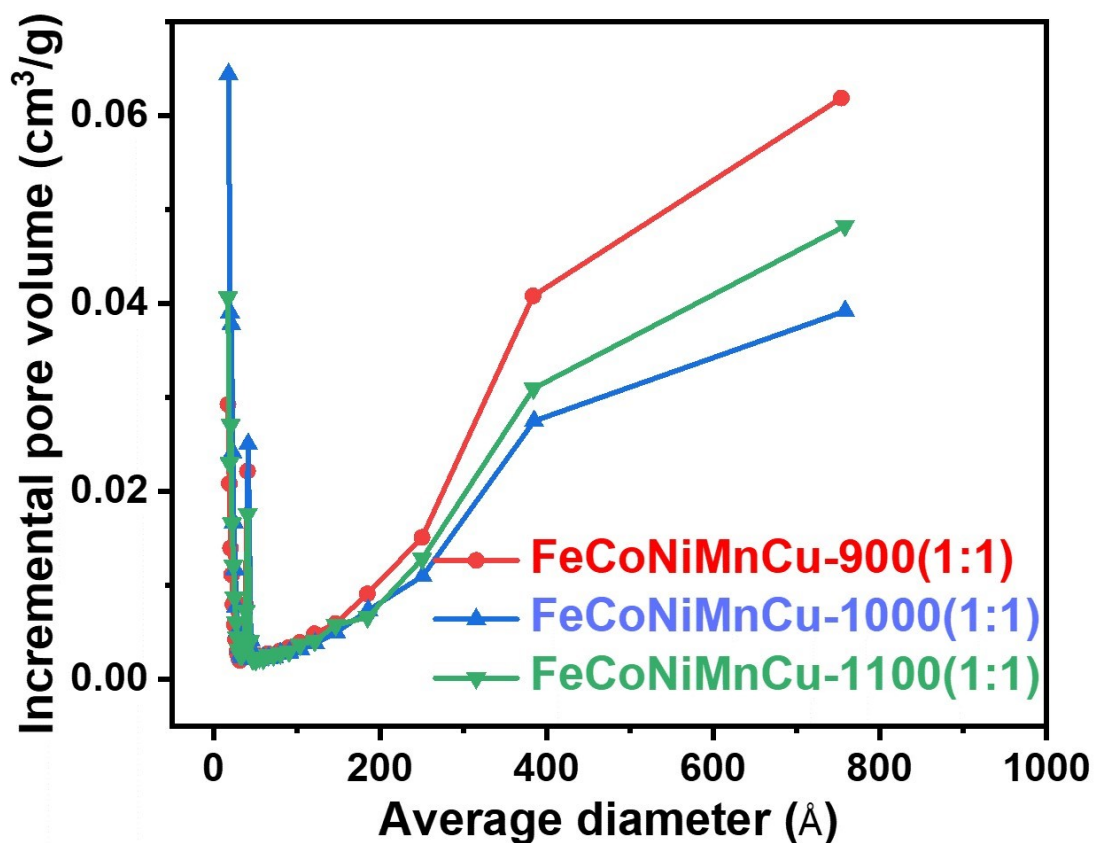

**Figure S4** The pore size distribution of FeCoNiMnCu-900(1:1), FeCoNiMnCu-1000(1:1) and FeCoNiMnCu-1100(1:1).

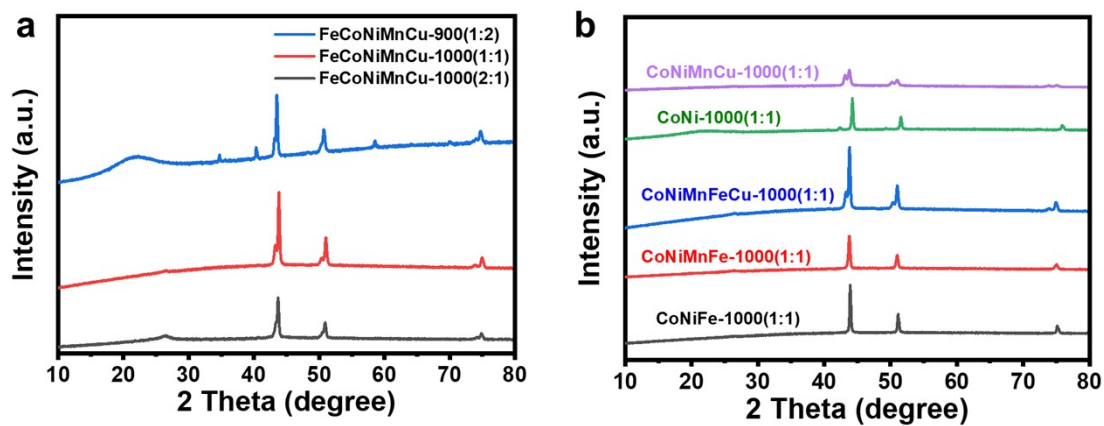

**Figure S5** The XRD results of a) FeCoNiMnCu-900(1:2), FeCoNiMnCu-1000(1:1) and FeCoNiMnCu-1000(2:1) b) CoNi-1000(1:1), CoFeNi-1000(1:1), CoFeNiMn-1000(1:1), CoNiMnCu-1000(1:1) and CoFeNiMnCu-1000(1:1).

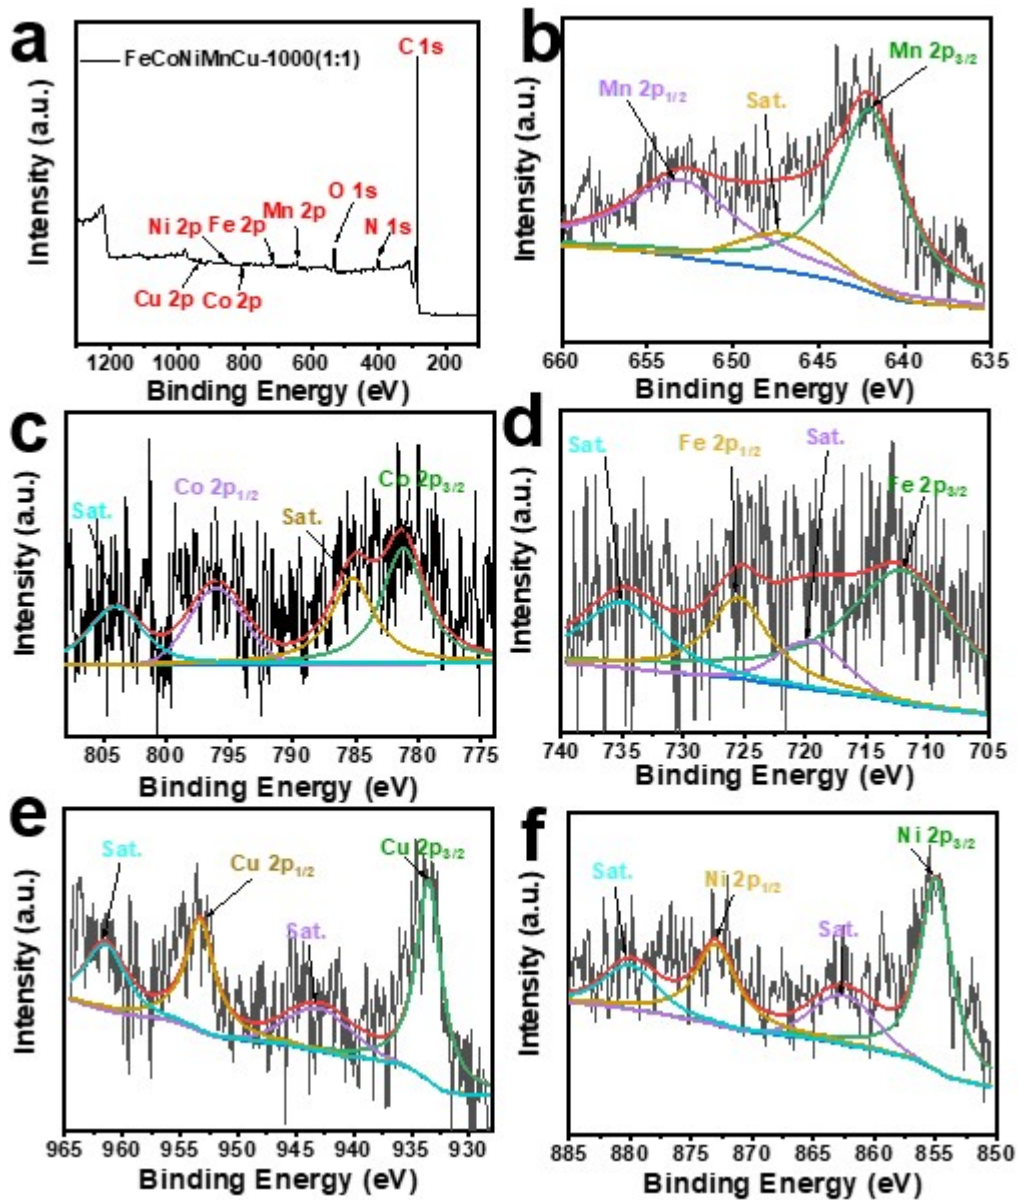

**Figure S6** The XPS spectrum of Mn 2p, Fe 2p, Ni 2p, Cu 2p, Co 2p for FeCoNiMnCu-1000(1:1).

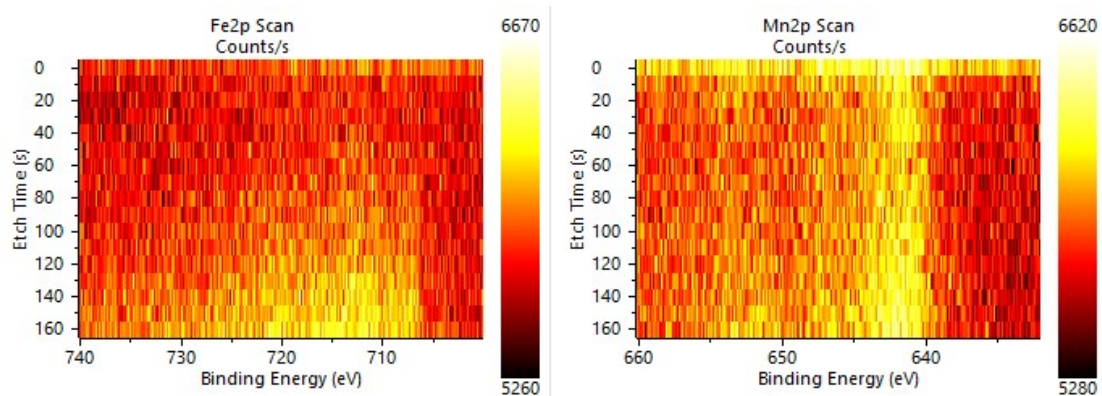

**Figure S7** The XPS depth profile of Mn 2p and Fe 2p for FeCoNiMnCu-

1000(1:1)

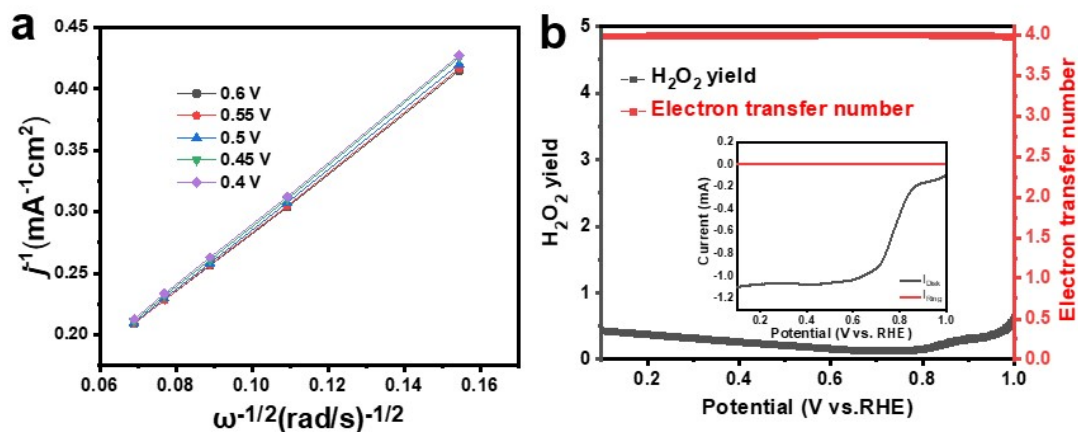

**Figure S8** a) the K-L plots and b) the H<sub>2</sub>O<sub>2</sub> yield rate and electron transfer number based on the set up of Ring and Disk electrode for FeCoNiMnCu-1000(1:1).

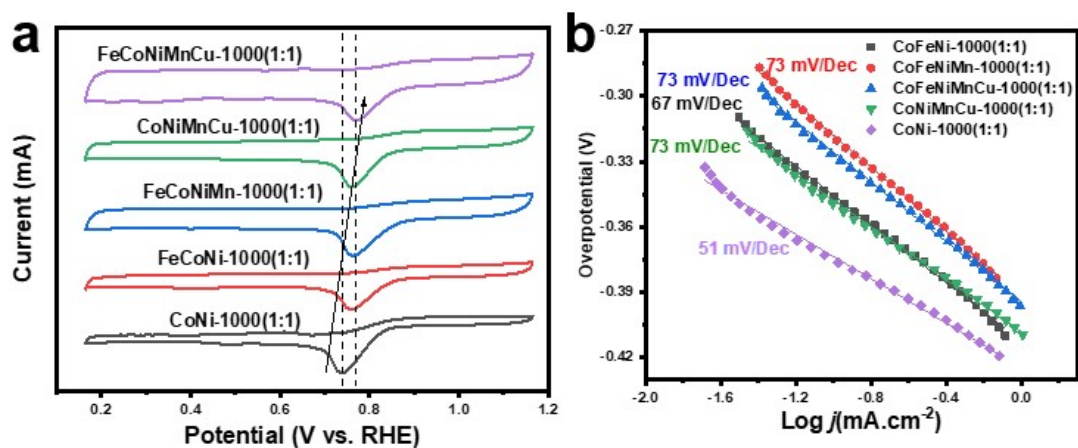

**Figure S9.** a) The CV curves of the catalysts with the various number of metals in O<sub>2</sub> atmosphere, b) and their corresponded Tafel slope of alloys metal composition.

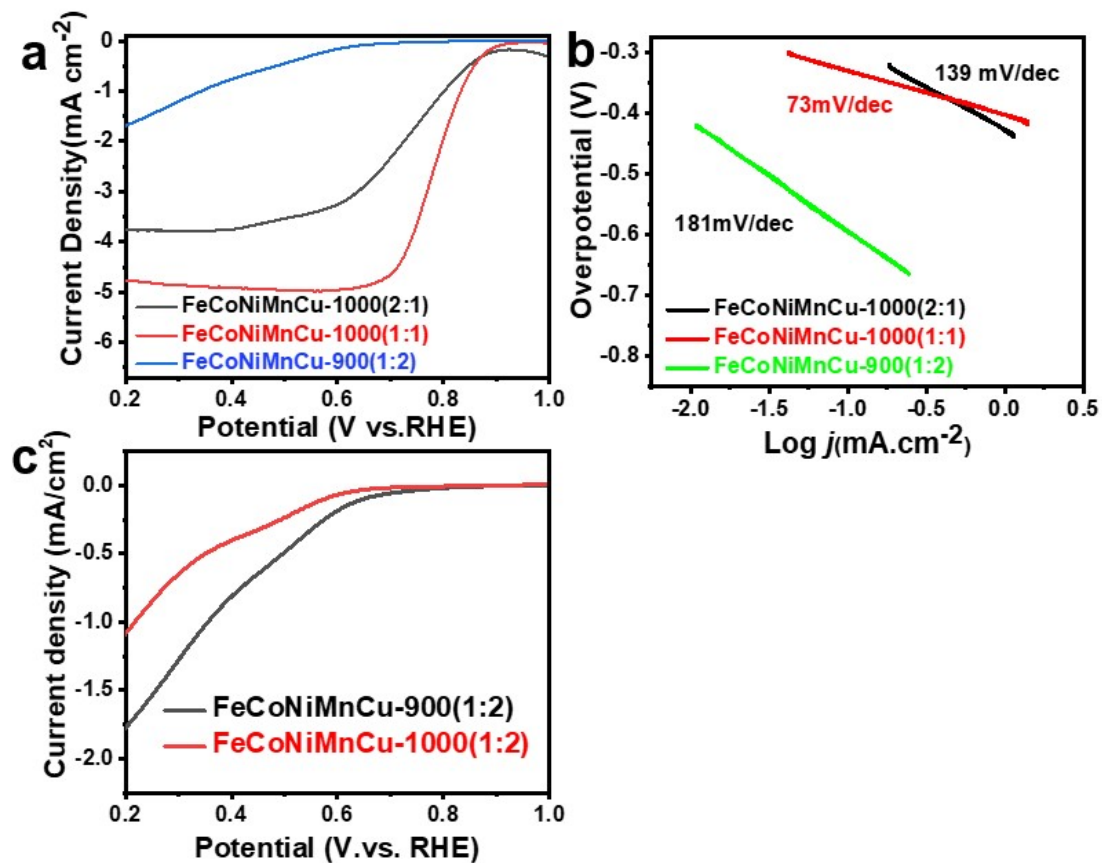

**Figure S10** a) LSV curves, b) Tafel slope of the prepared FeCoNiMnCu-1000(2:1), FeCoNiMnCu-1000(1:1), FeCoNiMnCu-900(1:2). c) LSV curves of FeCoNiMnCu-900(1:2) and FeCoNiMnCu-1000(1:2).

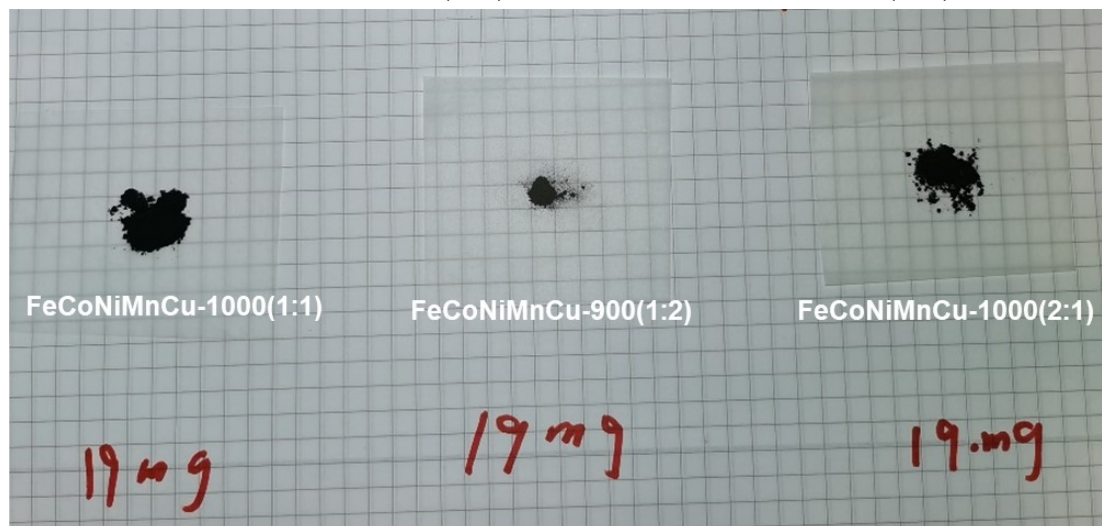

**Figure S11** the digital picture of FeCoNiMnCu-1000(2:1), FeCoNiMnCu-1000(1:1) and FeCoNiMnCu-900(1:2).

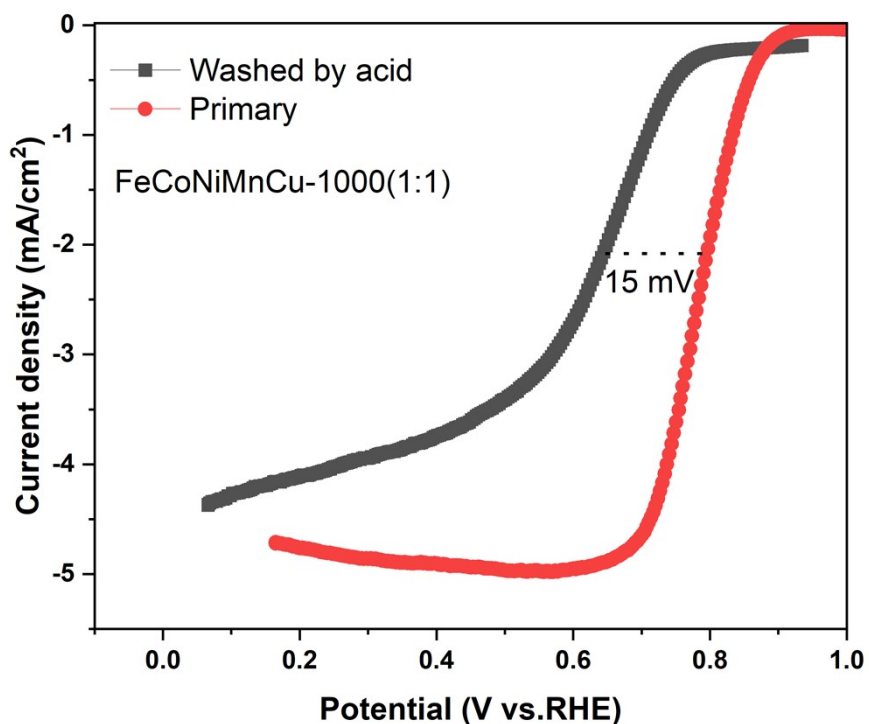

**Figure S12.** LSV curves of primary and washed by acid FeCoNiMnCu-1000(1:1) catalysts.

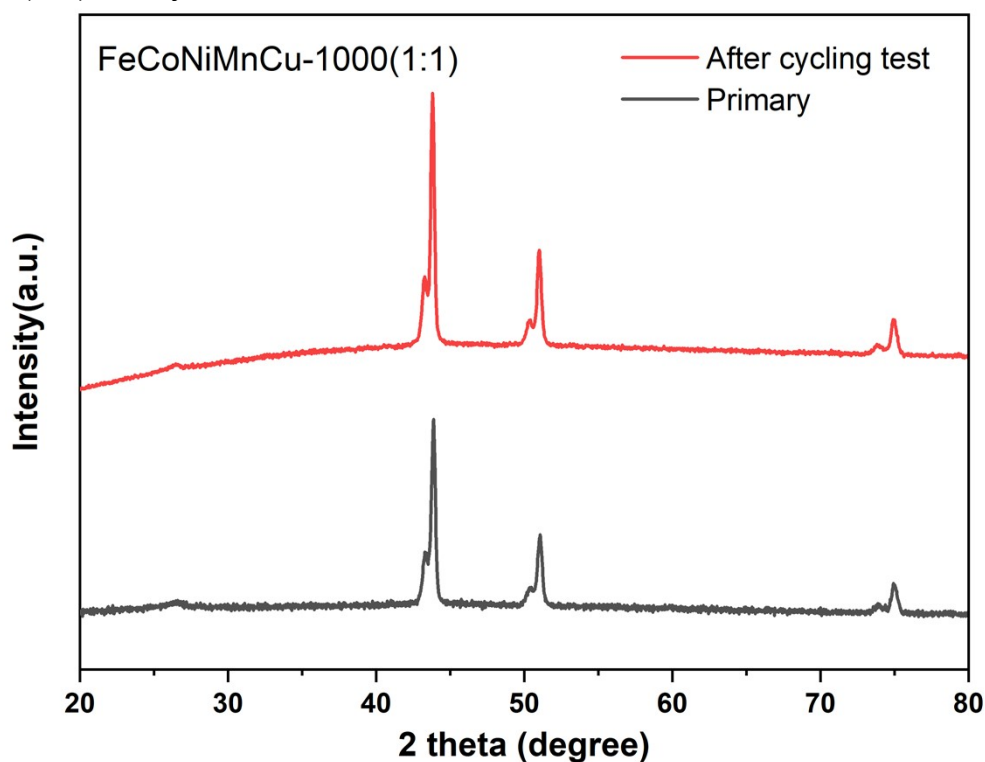

**Figure S13** XRD result of primary FeCoNiMnCu-1000 (1:1) and after long time CV test.



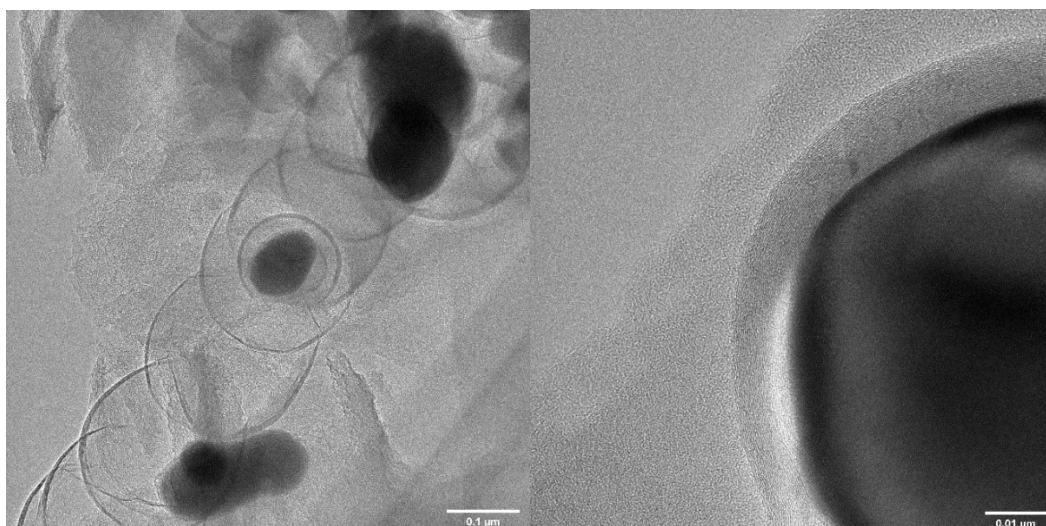

Figure S14 TEM images FeCoNiMnCu-1000 (1:1) after CV test.

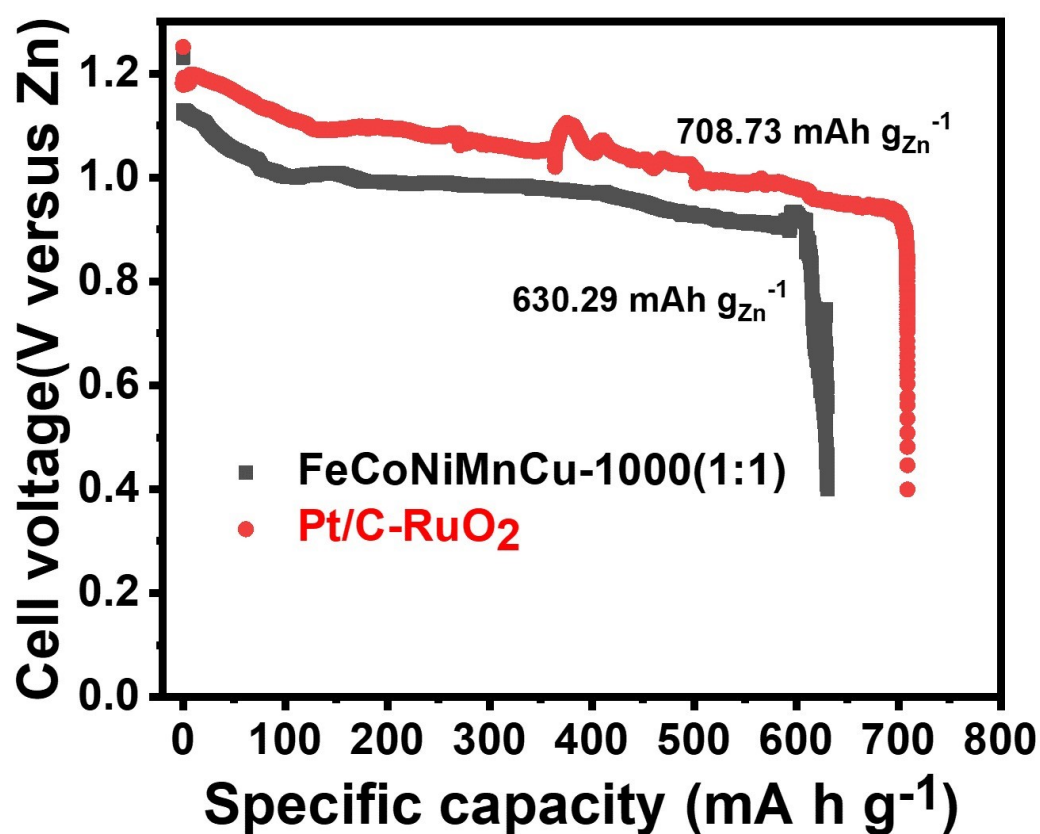

Figure S15 The specific capacity of FeCoNiMnCu-1000(1:1) and 20 wt% Pt/C-RuO<sub>2</sub> based on the zinc consumption.
